# Supplementary material
Source: Elsevier journal article supplement (https://www.sciencedirect.com/science/article/pii/S2173572722002065)

**Supplements online**

**Supplement online 1. Sample Size estimation**

**Dropout-Inflated Sample Size ────────────────────────────────────────────────**

**Dropout-**

**Inflated Expected**

**Enrolment Number of**

**Sample Size Sample Size Dropouts**

**Dropout Rate N N' D**

20% 50 63 13

20% 60 75 15

20% 70 88 18

20% 80 100 20

20% 90 113 23

20% 100 125 25

20% 110 138 28

20% 120 150 30

20% 130 163 33

20% 140 175 35

20% 150 188 38

**Supplement online 2. Area under the receiver operating characteristic curve of the multivariate regression model**


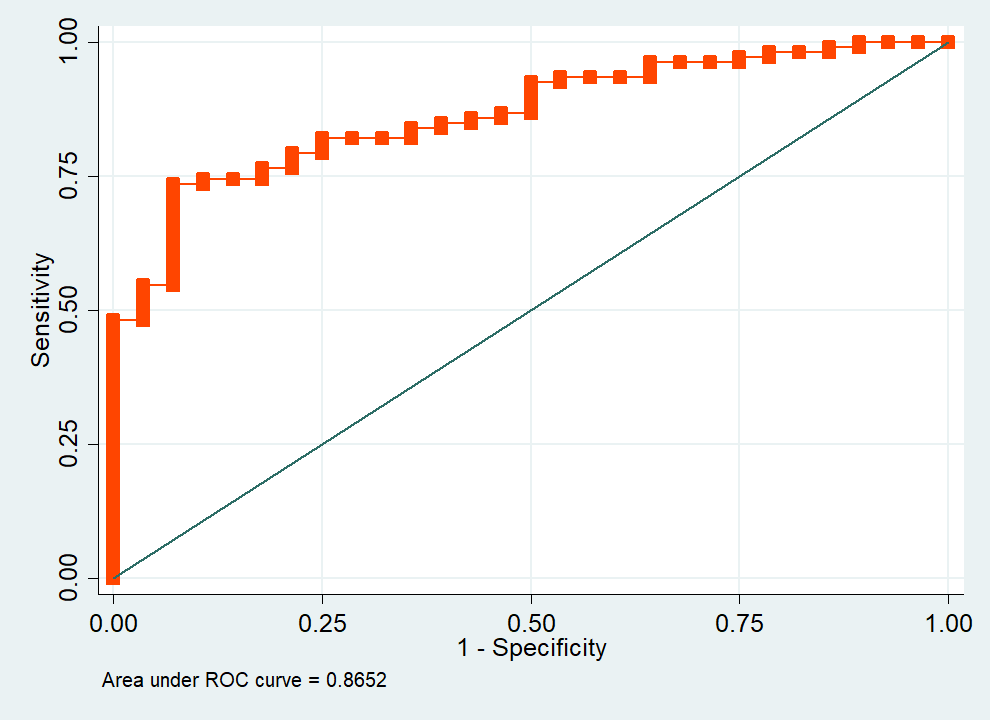

Supplement: mmc1 [file S2173572722002065:mmc1.docx]
